# Supplementary material for: Easily Prepared Transparent Electrodes for Low-Cost Semitransparent Inverted Polymer Solar Cells
Source: MDPI journal article supplement (doi:10.3390/en14185837), 2021-09-15
Supplement: s1 [file s1]

# Supporting Information

## Easily Prepared Transparent Electrodes for Low-Cost Semitransparent Inverted Polymer Solar Cells

Jiaxin Guo, Ziming Bu, Shuo Han, Yanyu Deng, Chunyu Liu\* and Wenbin Guo\*

<sup>1</sup> State Key Laboratory on Integrated Optoelectronics, College of Electronic Science and Engineering, Jilin University, 2699 Qianjin Street, Changchun 130012, People's Republic of China

\* Correspondence: chunyu\_liu@jlu.edu.cn (C.L.); guowb@jlu.edu.cn (W.G.)

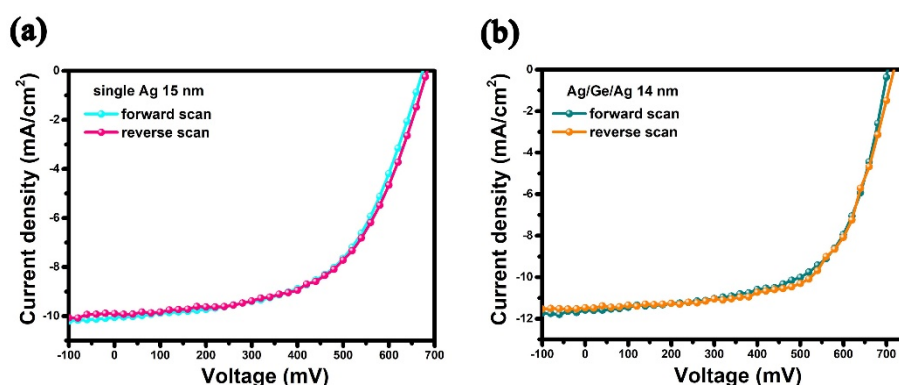

**Figure S1.** (a) J-V characteristics in forward and reverse scan of device with single Ag electrode and (b) device with Ag/Ge/Ag 14 nm electrode.

**Table S1.** J-V Parameters of devices with single Ag and Ag/Ge/Ag electrode in forward and reverse scan direction

| Device (nm)  | Scan direction | J <sub>SC</sub> (mA/cm <sup>2</sup> ) | V <sub>OC</sub> (V) | FF (%) | PCE (%) |
|--------------|----------------|---------------------------------------|---------------------|--------|---------|
| Single Ag 15 | forward        | 10.07                                 | 0.673               | 56     | 3.8     |
| Single Ag 15 | reverse        | 9.97                                  | 0.684               | 56     | 3.8     |
| Ag/Ge/Ag 14  | forward        | 11.63                                 | 0.703               | 63     | 5.1     |
| Ag/Ge/Ag 14  | reverse        | 11.50                                 | 0.715               | 63     | 5.1     |

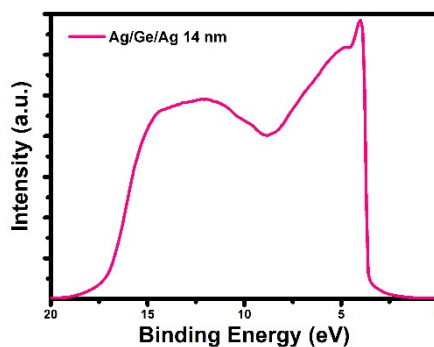

**Figure S2.** UPS spectrum of Ag/Ge/Ag film.

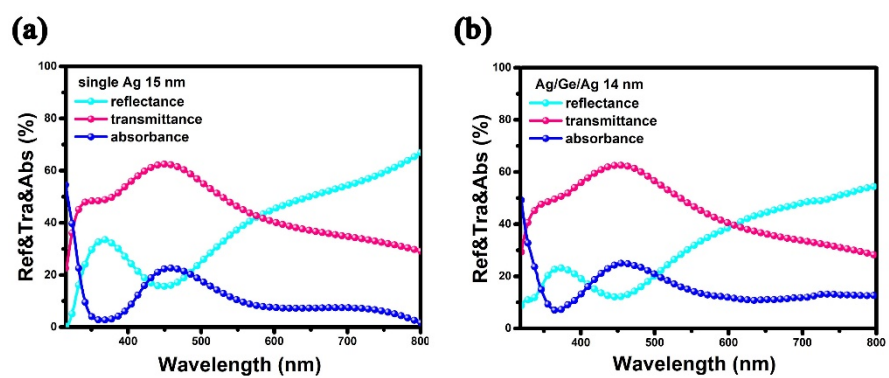

**Figure S3.** (a) The reflectance, absorbance and transmittance curves of single Ag 15 nm and (b) Ag/Ge/Ag 14 nm.
